# Supplementary material
Source: PubMed Central journal article supplement (PMC6311105)
Supplement: NIHMS1002948-supplement-SI.pdf [file NIHMS1002948-supplement-SI.pdf]

**Supplemental Material:**

**Quantitative Understanding of SHAPE Mechanism from RNA Structure and Dynamics Analysis**

**Travis HURST\***, **Xiaojun XU\***, **Peinan ZHAO**, **Shi-Jie CHEN<sup>‡</sup>**

Department of Physics, Department of Biochemistry, and University of Missouri Informatics Institute, University of Missouri, Columbia, MO 65211

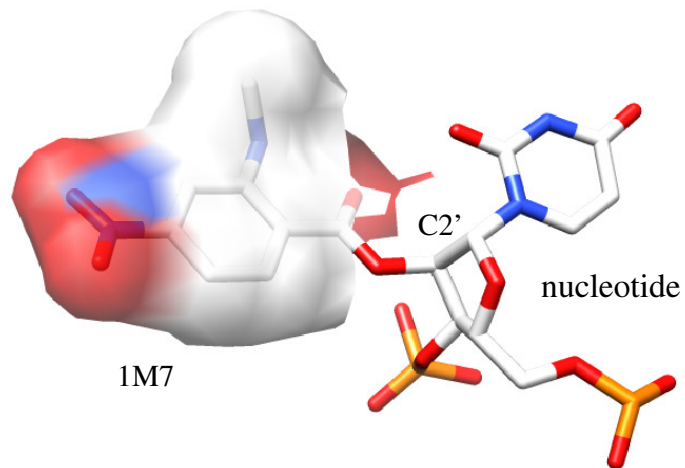

Figure S1: The 1M7-nucleotide bound conformation, built based on two similar ligands in the PDB database (PubChem CID 12076 and 66345). The effective ligand radius is measured using the Van der Waals surface shown in the figure.

Table S1: Parameter optimization using the leave-one-out approach.  $E_{st}$  and  $b$  are in kcal/mol,  $S_0$  is in  $\text{\AA}^2$ , and  $a$  is dimensionless.

| Value of $a$ | Value of $b$ | Value of $E_{st}$ | Value of $S_0$ | Training set | Optimal total correlation |
|--------------|--------------|-------------------|----------------|--------------|---------------------------|
| 0.03         | -0.80        | -0.20             | 16             | without 3DIG | 7.53                      |
| 0.03         | -0.45        | -0.20             | 17             | without 1Y26 | 7.29                      |
| 0.03         | -0.40        | -0.25             | 16             | without 2GDI | 7.26                      |
| 0.03         | -0.50        | -0.25             | 14             | without 3IWN | 7.48                      |
| 0.03         | -0.48        | -0.28             | 14             | without 1NBS | 7.61                      |
| 0.03         | -0.60        | -0.25             | 15             | without 4KQY | 7.45                      |
| 0.03         | -0.55        | -0.25             | 15             | without 2L8H | 7.20                      |
| 0.03         | -0.33        | -0.25             | 22             | without 2L1V | 7.46                      |
| 0.03         | -0.50        | -0.20             | 15             | without 3PDR | 7.58                      |
| 0.03         | -0.45        | -0.25             | 14             | without 1VTQ | 7.48                      |
| 0.03         | -0.48        | -0.25             | 16             | without 1EHZ | 7.42                      |
| 0.03         | -0.43        | -0.25             | 12             | without 1AUD | 7.31                      |

Table S2: Experimental conditions of the SHAPE chemical probing for twelve RNAs.

| Source name                                  | PDB id | Reagent | Solution conditions                                     | Ref. |
|----------------------------------------------|--------|---------|---------------------------------------------------------|------|
| Lysine riboswitch, <i>T. maritime</i>        | 3DIG   | 1M7     | 100mM HEPES, 100mM NaCl, 10mM MgCl <sub>2</sub> , 310K  | [2]  |
| adenine riboswitch                           | 1Y26   | 1M7     | 50 mM HEPES, 200mM KOAc, 3mM MgCl <sub>2</sub> , 298K   | [1]  |
| TPP riboswitch, <i>E. coli</i>               | 2GDI   | 1M7     | 100mM HEPES, 100mM NaCl, 10mM MgCl <sub>2</sub> , 310K  | [2]  |
| cyclic-di-GMP riboswitch, <i>V. cholerae</i> | 3IWN   | 1M7     | 50mM HEPES, 200mM KOAc, 3mM MgCl <sub>2</sub> , 310K    | [2]  |
| SAM I riboswitch, <i>T. tengcongensis</i>    | 4KQY   | 1M7     | 100mM HEPES, 100mM NaCl, 10mM MgCl <sub>2</sub> , 310K  | [2]  |
| RNaseP specificity domain                    | 1NBS   | 1M7     | 50 mM HEPES, 200 mM KOAc, 3 mM MgCl <sub>2</sub> , 298K | [1]  |
| TAR RNA from HIV-1                           | 2L8H   | 1M7     | 50 mM HEPES, 50 mM KCl, 298K                            | [3]  |
| Pre-Q1 riboswitch                            | 2L1V   | 1M7     | 100 mM HEPES, 100 mM NaCl, 10 mM MgCl, 310K             | [2]  |
| M-Box riboswitch                             | 3PDR   | 1M7     | 100 mM HEPES, 100 mM NaCl, 10 mM MgCl, 310K             | [2]  |
| tRNAasp                                      | 1VTQ   | 1M7     | 100 mM HEPES, 100 mM NaCl, 10 mM MgCl, 310K             | [2]  |
| tRNAphe                                      | 1EHZ   | 1M7     | 100 mM HEPES, 100 mM NaCl, 10 mM MgCl, 310K             | [4]  |
| U1A protein binding site RNA                 | 1AUD   | 1M7     | 50 mM HEPES, 50 mM KCl, 298K                            | [3]  |

Table S3: Sequences, native 2D, and non-native 2D structures.

| PDB id       | Label                       | Structure                                                                                                                                                            |
|--------------|-----------------------------|----------------------------------------------------------------------------------------------------------------------------------------------------------------------|
| 1AUD         | Sequence                    | GGCAGAGUCCUUCGGGACAUUGCACCUGCC                                                                                                                                       |
|              | Native                      | (((((.((((.....)))).....))))                                                                                                                                         |
|              | Non-native 1                | .(((.((((.....))))..)).....                                                                                                                                          |
|              | Non-native 2                | .....(((.....)))..(.....).                                                                                                                                           |
|              | Non-native 3                | (((((.((((.....)).....))..))))                                                                                                                                       |
|              | Non-native 4                | (((((.(.....(((.....))..))))))                                                                                                                                       |
| Non-native 5 | ((.....(((.....))))..)..... |                                                                                                                                                                      |
| 1EHZ         | Sequence                    | GCGGAUUUAGCUCAGUUGGGAGAGCGCCAGACUGAAGAUCUGGAGGUCCUGUGUUCGAUC<br>CACAGAAUUCGCACCA                                                                                     |
|              | Native                      | ((((((((.....(((.....))))..(((.....)))).....(((.....)))<br>)))))))))).....                                                                                           |
|              | Non-native 1                | (((((.....(((.....(((.....))..))))))..(((.....(((.....)))<br>..)))))).....                                                                                           |
|              | Non-native 2                | ((((((((.....(((.....)))..(((.....(((.....))))..)))))).....<br>.....)))))).....                                                                                      |
|              | Non-native 3                | ((((((((.....(((.....(((.....))..))))))..(((.....(((.....))<br>.....)))))).....                                                                                      |
|              | Non-native 4                | ((((((((.....(((.....(((.....(((.....))))..))))))..))<br>).)))))).....                                                                                               |
|              | Non-native 5                | ((((((((.....(((.....)))).....(((.....(((.....))..))..))<br>.....)))))).....                                                                                         |
| 1NBS         | Sequence                    | GCGAGCCUAGCGAAGUCAUAAGCUAGGGCAGUCUUUAGAGGCUGACGGCAGGAAAAAGC<br>CUACGUCUUCGGAUAUGGCUGAGUAUCCUUGAAAGUGCCACAGUGACGAAGUCUCACUAG<br>AAUUGGUGAGAGUGGAACGCGGUAAACCCUCGC     |
|              | Native                      | (((((((((((.....))))..(((.....))))..((.....(((.....(((<br>.....(((.....))..)))))).....(((.....(((.....(((.....(((<br>.....)))))).....))))))..)))))                   |
|              | Non-native 1                | (((((((((((.....))))..(((.....))))..((.....(((.....(((<br>.....(((.....))..)))))).....(((.....(((.....(((.....(((<br>.....))))))..))..))..))..))..)))))              |
|              | Non-native 2                | (((((((((((.....))))..(((.....))))((.....(((.....(((<br>.....(((.....))..))))..))))..)))).....(((.....(((.....(((<br>.....))))))..))..))..)))))                      |
|              | Non-native 3                | (((((((((((.....))))..(((.....))))..((.....(((.....(((<br>.....(((.....))..))))..))))..)))).....(((.....(((.....(((<br>.....))))))..))..))..)))))                    |
|              | Non-native 4                | (((((.....(((.....(((.....(((.....))))..))))))..(((.....(((.....(((<br>.....(((.....))..))))..))))..))))..)))).....(((.....(((.....(((<br>.....))))))..))..))..))))) |
|              | Non-native 5                | (((((((((((.....))))((.....(((.....(((.....(((.....(((<br>.....(((.....))..))))..))))..))))..))))..)))).....(((.....(((.....(((<br>.....))))))..))..))..)))))        |

Table S4: Sequences, native 2D, and non-native 2D structures.

| PDB id | Label        | Structure                                                                                         |
|--------|--------------|---------------------------------------------------------------------------------------------------|
| 1VTQ   | Sequence     | UCCGUGAUAGUUUAAUGGUCAGAAUGGGCGCUUGUCGCGUGCCAGAUCGGGGUUCAAUUCCC<br>CGUCGCGGAGCCA                   |
|        | Native       | (((((.....))))).....(((((.....))))).....(((((.....))))).....                                      |
|        | Non-native 1 | (((((.....(((((.....))))).....))))).....(((((.....))))).....                                      |
|        | Non-native 2 | (((((.....(((((.....(((((.....))))).....))))).....))))).....(((((.....))))).....                  |
|        | Non-native 3 | (((((.....(((((.....(((((.....))))).....))))).....))))).....(((((.....))))).....                  |
|        | Non-native 4 | (((((.....(((((.....(((((.....(((((.....))))).....))))).....))))).....)).....(((((.....)))))..... |
|        | Non-native 5 | (((((.....))))).....(((((.....))))).....(((((.....))))).....(((((.....))))).....                  |
| 1Y26   | Sequence     | CGCUUCAUAUAAUCCUAAUGAUUGGUUUGGAGUUUCUACCAAGAGCCUAAACUCUUGAU<br>UAUGAAGUG                          |
|        | Native       | (((((.....[.....]).....)).....(((((.....))))).....(((((.....))))).....                            |
|        | Non-native 1 | (((((.....(((((.....))))).....))))).....(((((.....))))).....                                      |
|        | Non-native 2 | (((((.....(((((.....(((((.....))))).....))))).....))))).....(((((.....))))).....                  |
|        | Non-native 3 | (((((.....(((((.....(((((.....(((((.....))))).....))))).....))))).....)).....                     |
|        | Non-native 4 | (((((.....(((((.....(((((.....(((((.....))))).....))))).....))))).....)).....(((((.....)))))..... |
|        | Non-native 5 | (((((.....(((((.....(((((.....(((((.....))))).....))))).....))))).....)).....                     |
| 2GDI   | Sequence     | GACUCGGGGUGCCCUUCUGCGUGAAGGCUGAGAAAUACCCGUAUCACCUGAUCUGGAUAAUG<br>CCAGCGUAGGGAAGUUC               |
|        | Native       | (((((.....(((((.....))))).....))))).....(((((.....))))).....(((((.....))))).....                  |
|        | Non-native 1 | (((((.....(((((.....(((((.....))))).....))))).....))))).....(((((.....))))).....                  |
|        | Non-native 2 | (((((.....(((((.....(((((.....(((((.....))))).....))))).....))))).....)).....(((((.....)))))..... |
|        | Non-native 3 | (((((.....(((((.....(((((.....(((((.....))))).....))))).....))))).....)).....(((((.....)))))..... |
|        | Non-native 4 | (((((.....(((((.....(((((.....(((((.....))))).....))))).....))))).....)).....(((((.....)))))..... |
|        | Non-native 5 | (((((.....(((((.....(((((.....(((((.....))))).....))))).....))))).....)).....(((((.....)))))..... |



Table S6: Sequences, native 2D, and non-native 2D structures.

| PDB id       | Label                                                                                                                                                      | Structure                                                                                                                                                            |
|--------------|------------------------------------------------------------------------------------------------------------------------------------------------------------|----------------------------------------------------------------------------------------------------------------------------------------------------------------------|
| 2L8H         | Sequence                                                                                                                                                   | GGCAGAUUCUGAGCCUGGGAGCUCUCUGCC                                                                                                                                       |
|              | Native                                                                                                                                                     | (((((...(((((.....)))))))))))                                                                                                                                        |
|              | Non-native 1                                                                                                                                               | (((((...(((((.....)))))))))))                                                                                                                                        |
|              | Non-native 2                                                                                                                                               | ((((((((.....))).....))))))                                                                                                                                          |
|              | Non-native 3                                                                                                                                               | ((((((((.....))).....))))))                                                                                                                                          |
|              | Non-native 4                                                                                                                                               | ((((((((.....))).....))))))                                                                                                                                          |
| Non-native 5 | (((((.....)).....))))                                                                                                                                      |                                                                                                                                                                      |
| 3PDR         | Sequence                                                                                                                                                   | CUUCGUUAGGUGAGGCCUCCUGUAUGGAGAUACGCUGCUGCCAAAAAUGUCCAAAGACGC<br>CAAUGGGUCAACAGAAAUCAUCGACAUAAGGUGAUUUUUAAUGCAGCUGGAUGCUUGUCC<br>UAUGCCAUAACAGUGCUAAAAGCUCUACGAUUGAAG |
|              | Native                                                                                                                                                     | (((((...(((((.....(((((.....(((((.....))))).<br>.....)))))).....)))))).....)))))).....))))).((.....))<br>.....)))))))).)).....)).....))))                            |
|              | Non-native 1                                                                                                                                               | ..(((...(((((.....(((((.....(((((.....))))).<br>.....)))))).....)))))).....))))).((.....))<br>.....)))))))).)).....)).....)))).....                                  |
|              | Non-native 2                                                                                                                                               | ..(((...(((((.....(((((.....(((((.....)).....(((((.....))<br>.....)))))).....)))))).....))))).((.....))<br>.....)))))))).)).....)).....)))).....                     |
|              | Non-native 3                                                                                                                                               | ..(((...(((((.....(((((.....(((((.....)).....(((((.....))<br>.....)))))).....)))))).....))))).((.....))<br>.....)))))))).)).....)).....)))).....                     |
|              | Non-native 4                                                                                                                                               | (((((.....))))).(((((.....(((((.....(((((.....))))).<br>.....)))))).....)))))).....))))).((.....))<br>.....)))))))).((.....)).....                                   |
|              | Non-native 5                                                                                                                                               | ((.....(((((.....(((((.....))))).<br>.....)))))).....))))).((.....))<br>.....))))).((.....)).....))                                                                  |
| 4KQY         | Sequence                                                                                                                                                   | UUCUUAUCAAGAGAAGCAGAGGGACUGGCCCGACGAAGCUUCAGCAACCGGUGUAAUGGC<br>GAAAGCCAUGACCAAGGUGCUAAAUCCAGCAAGCUCGAACAGCUUGGAAGAUAAAGAA                                           |
|              | Native                                                                                                                                                     | ((((((((.....(((((.....(((((.....))))).((.....(((((.....(((((.....))<br>.....)))))).....)))))).....)))))).....)))))).....)).....)))))<br>.....)).....)))))           |
|              | Non-native 1                                                                                                                                               | ..((((((.....(((((.....(((((.....))))).((.....(((((.....(((((.....))<br>.....)))))).....)))))).....)))))).....)))))).....)).....)))))<br>.....)).....)))))           |
|              | Non-native 2                                                                                                                                               | ..((((((.....(((((.....(((((.....))))).((.....(((((.....(((((.....))<br>.....)))))).....)))))).....)))))).....)))))).....)).....)))))<br>.....)).....)))))           |
|              | Non-native 3                                                                                                                                               | ..((((((.....(((((.....(((((.....))))).((.....(((((.....(((((.....))<br>.....)))))).....)))))).....)))))).....)))))).....)).....)))))<br>.....)).....)))))           |
|              | Non-native 4                                                                                                                                               | ..((((((.....(((((.....(((((.....))))).((.....(((((.....(((((.....))<br>.....)))))).....)))))).....)))))).....)))))).....)).....)))))<br>.....)).....)))))           |
| Non-native 5 | ..((((((.....(((((.....(((((.....))))).((.....(((((.....(((((.....))<br>.....)))))).....)))))).....)))))).....)))))).....)).....)))))<br>.....)).....))))) |                                                                                                                                                                      |

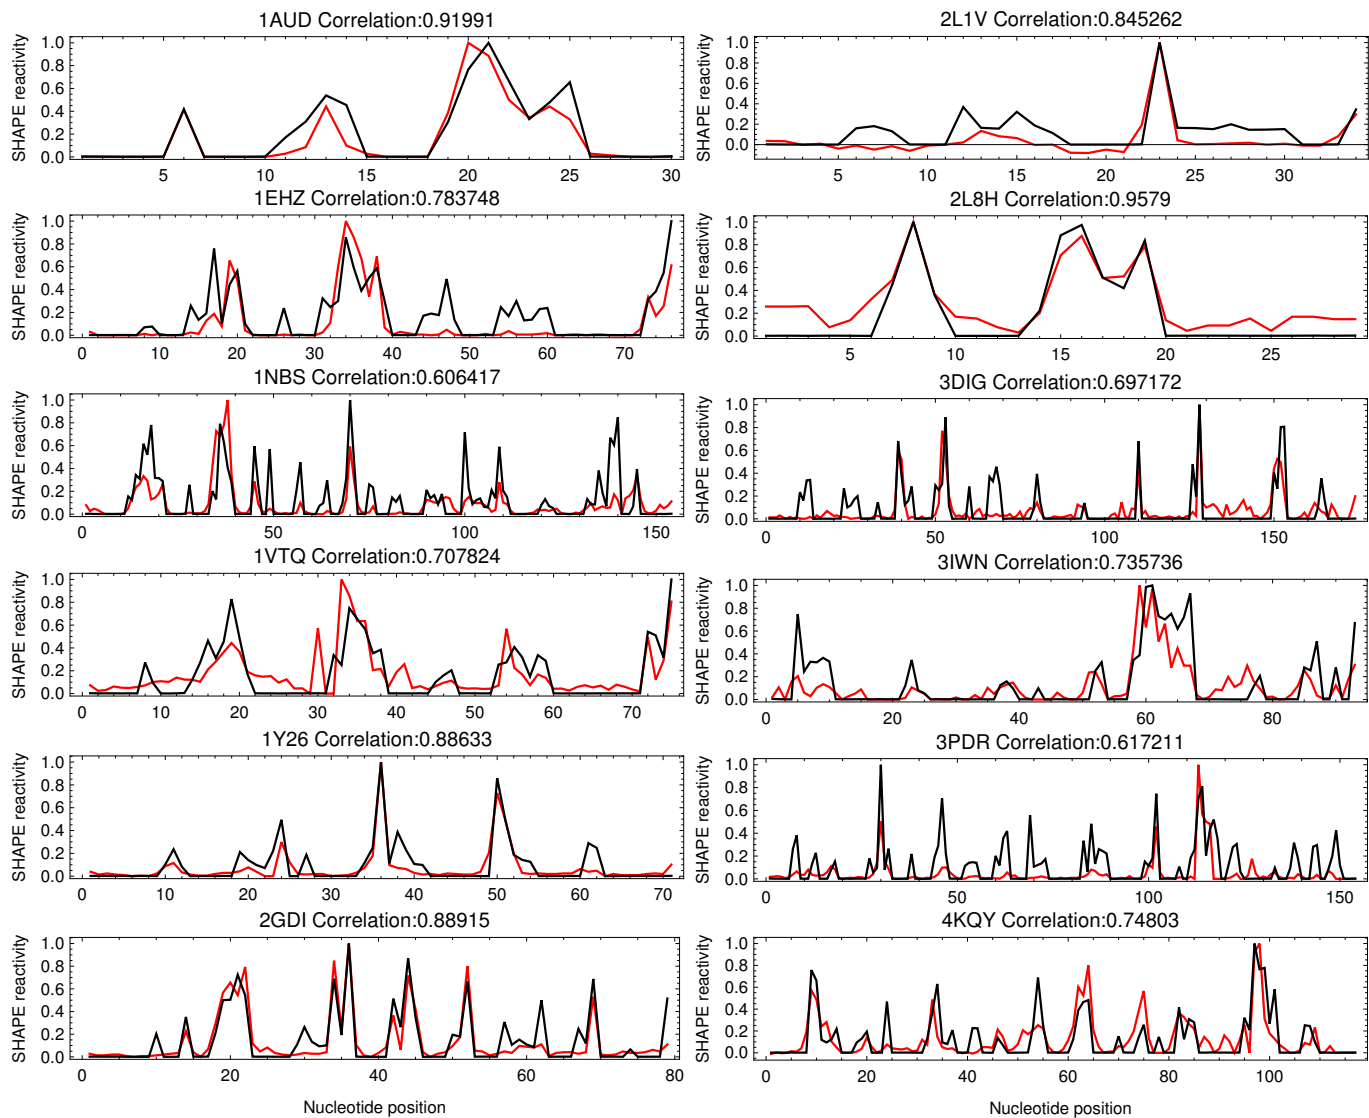

Figure S2: Comparison between the predicted (black) and the experimental (red) SHAPE profiles.

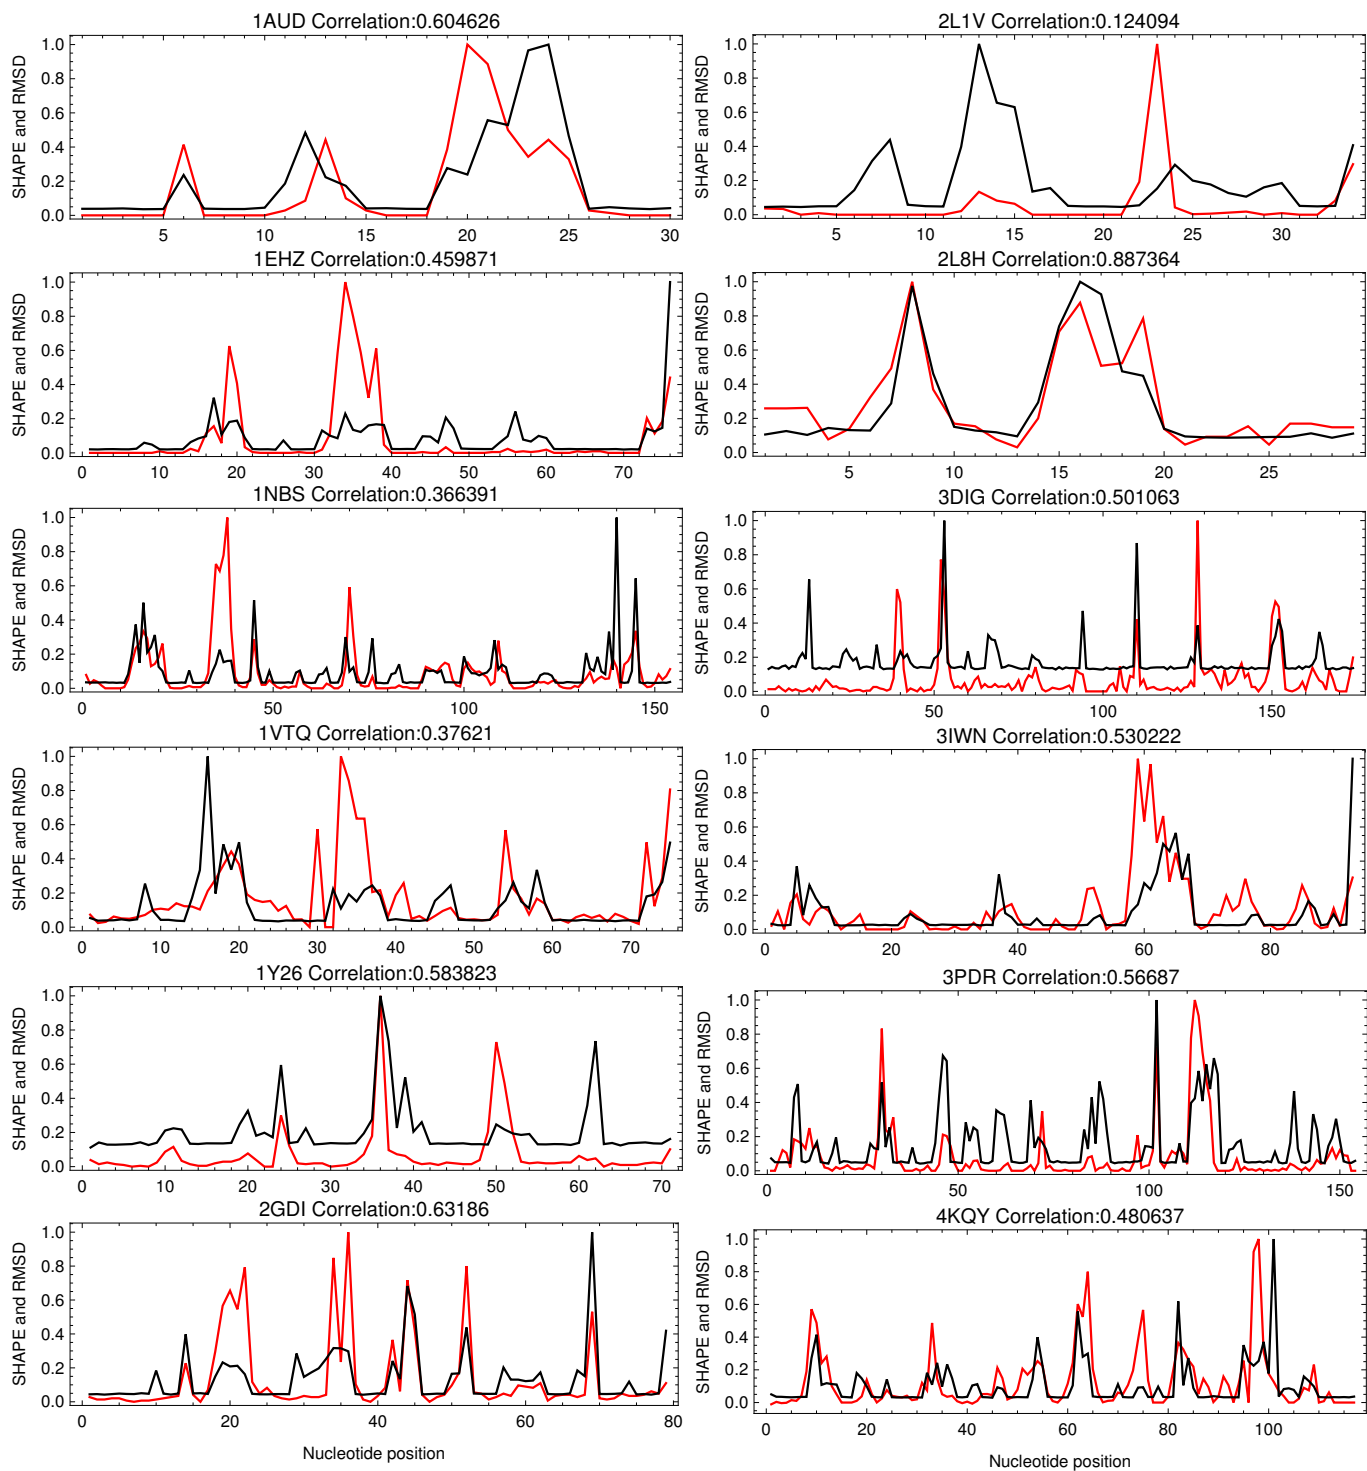

Figure S3: Comparison between the nucleotide RMSD (black) and the experimental SHAPE (red) profiles.



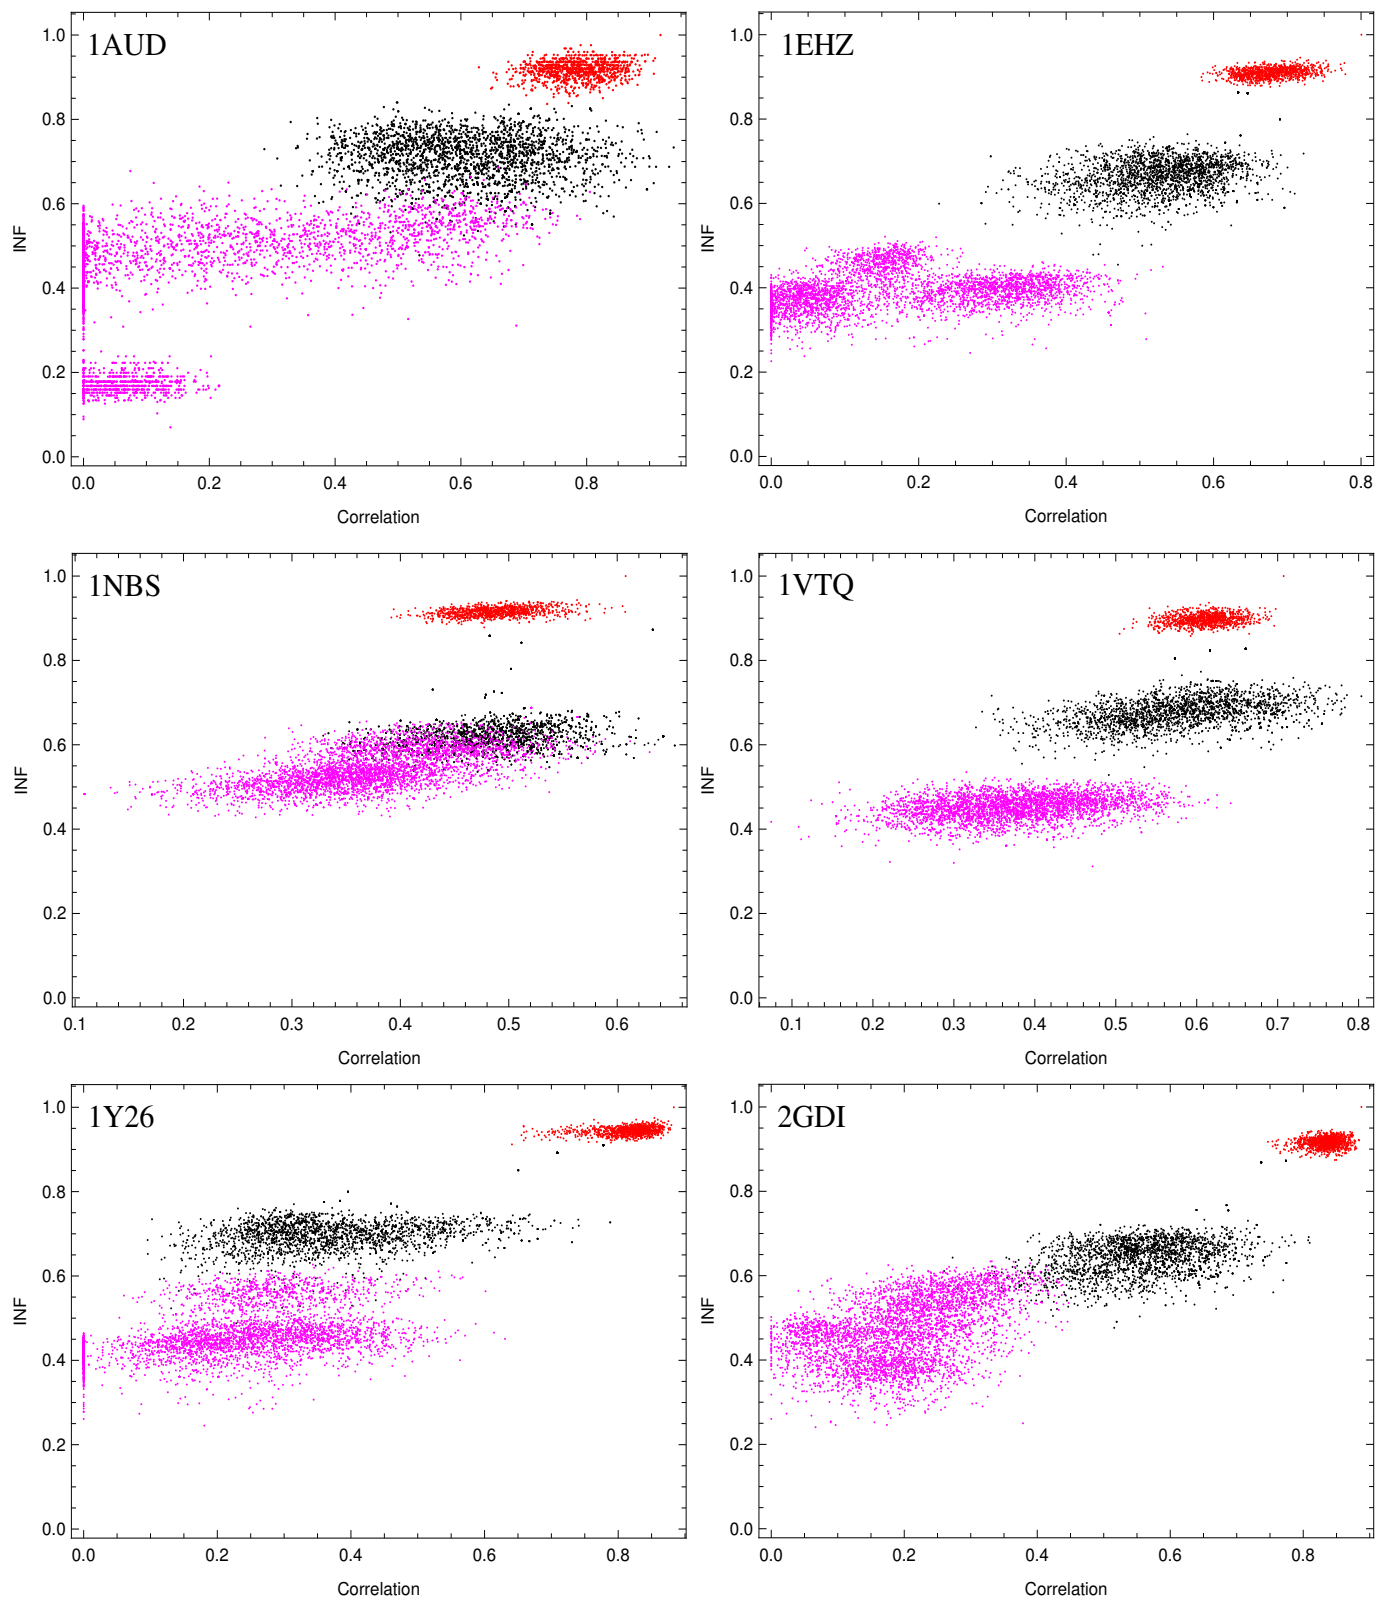

Figure S4: Comparison of INF and correlation for the first six cases. Near-native structures from all-atom MD sampling are red; native 2D, non-native 3D structures from CG sampling are black; non-native 2D, non-native 3D structures from CG sampling are magenta.

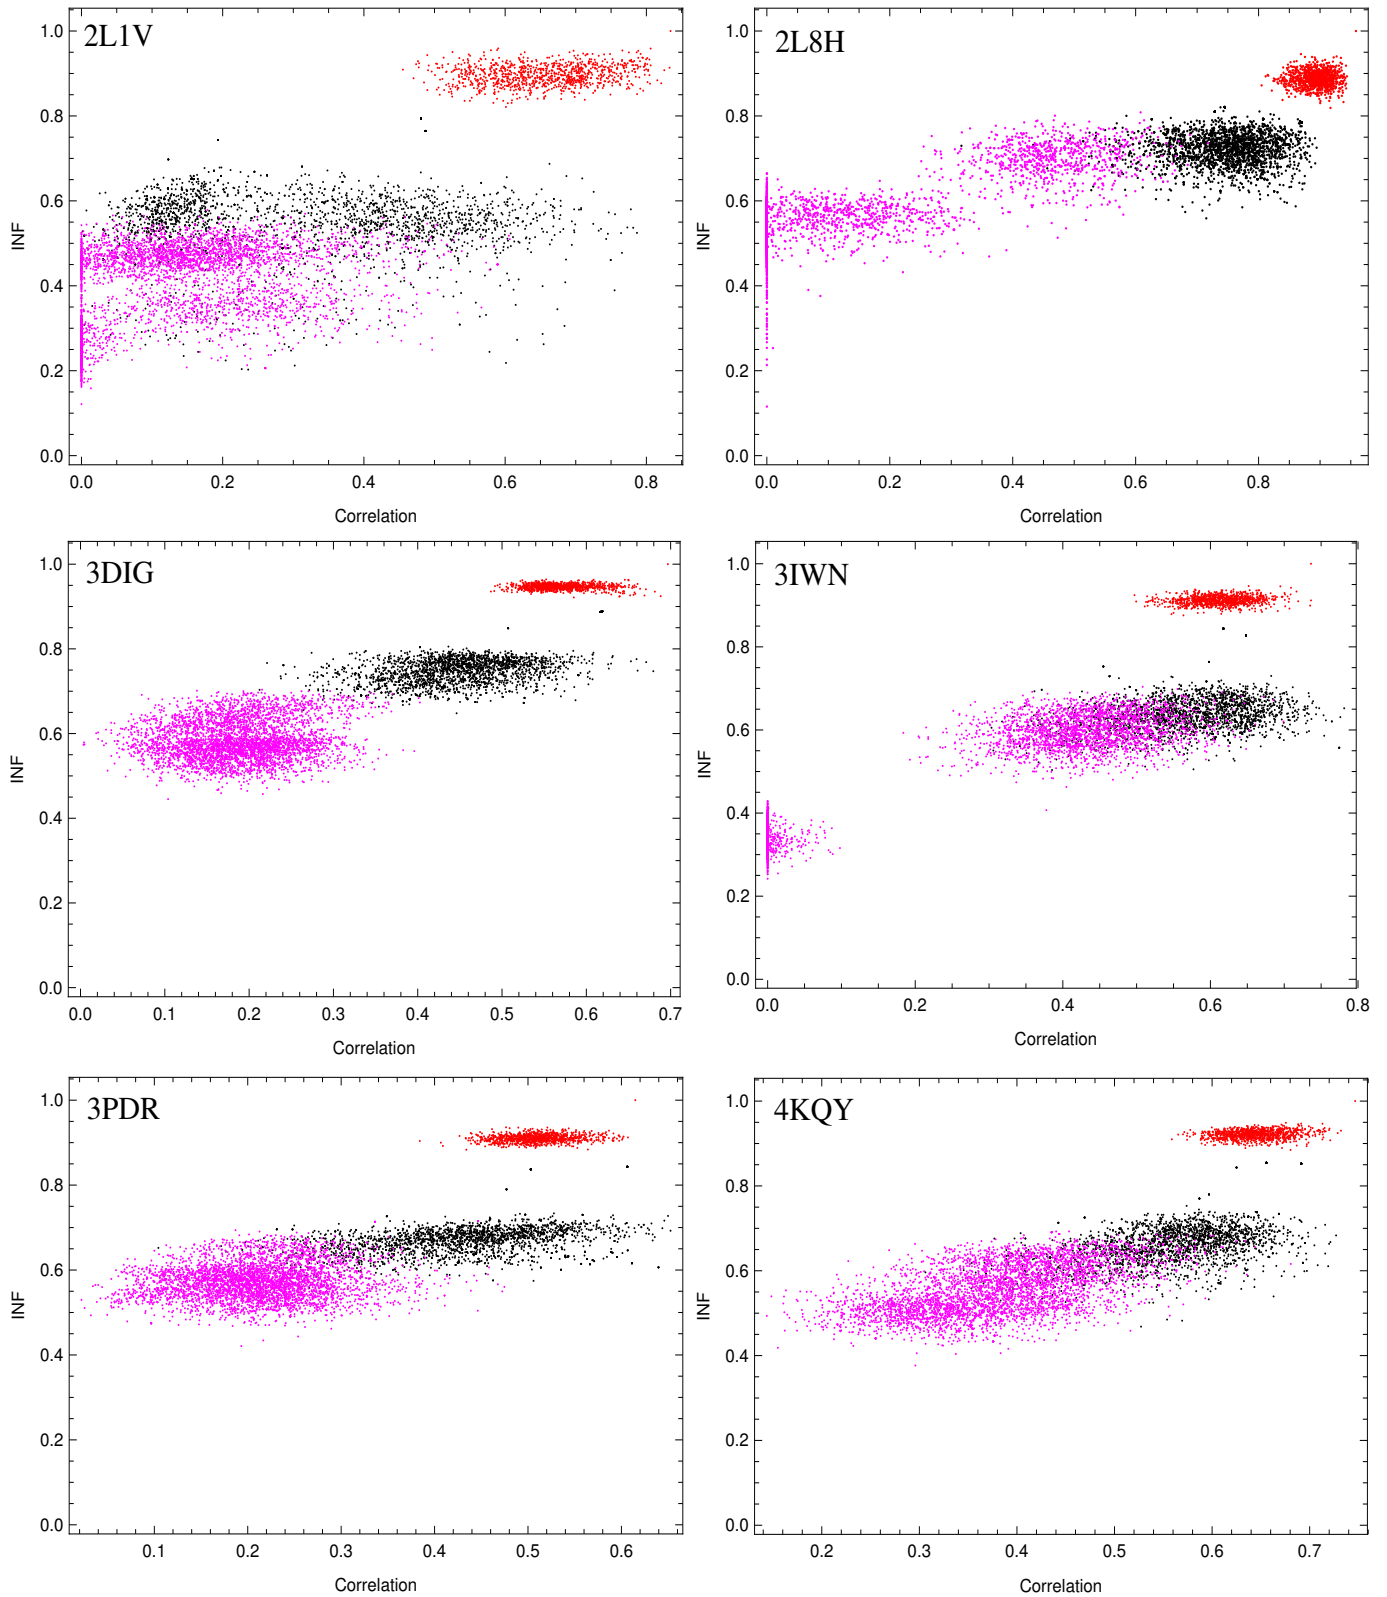

Figure S5: Comparison of INF and correlation for the last six cases. Near-native structures from all-atom MD sampling are red; native 2D, non-native 3D structures from CG sampling are black; non-native 2D, non-native 3D structures from CG sampling are magenta.

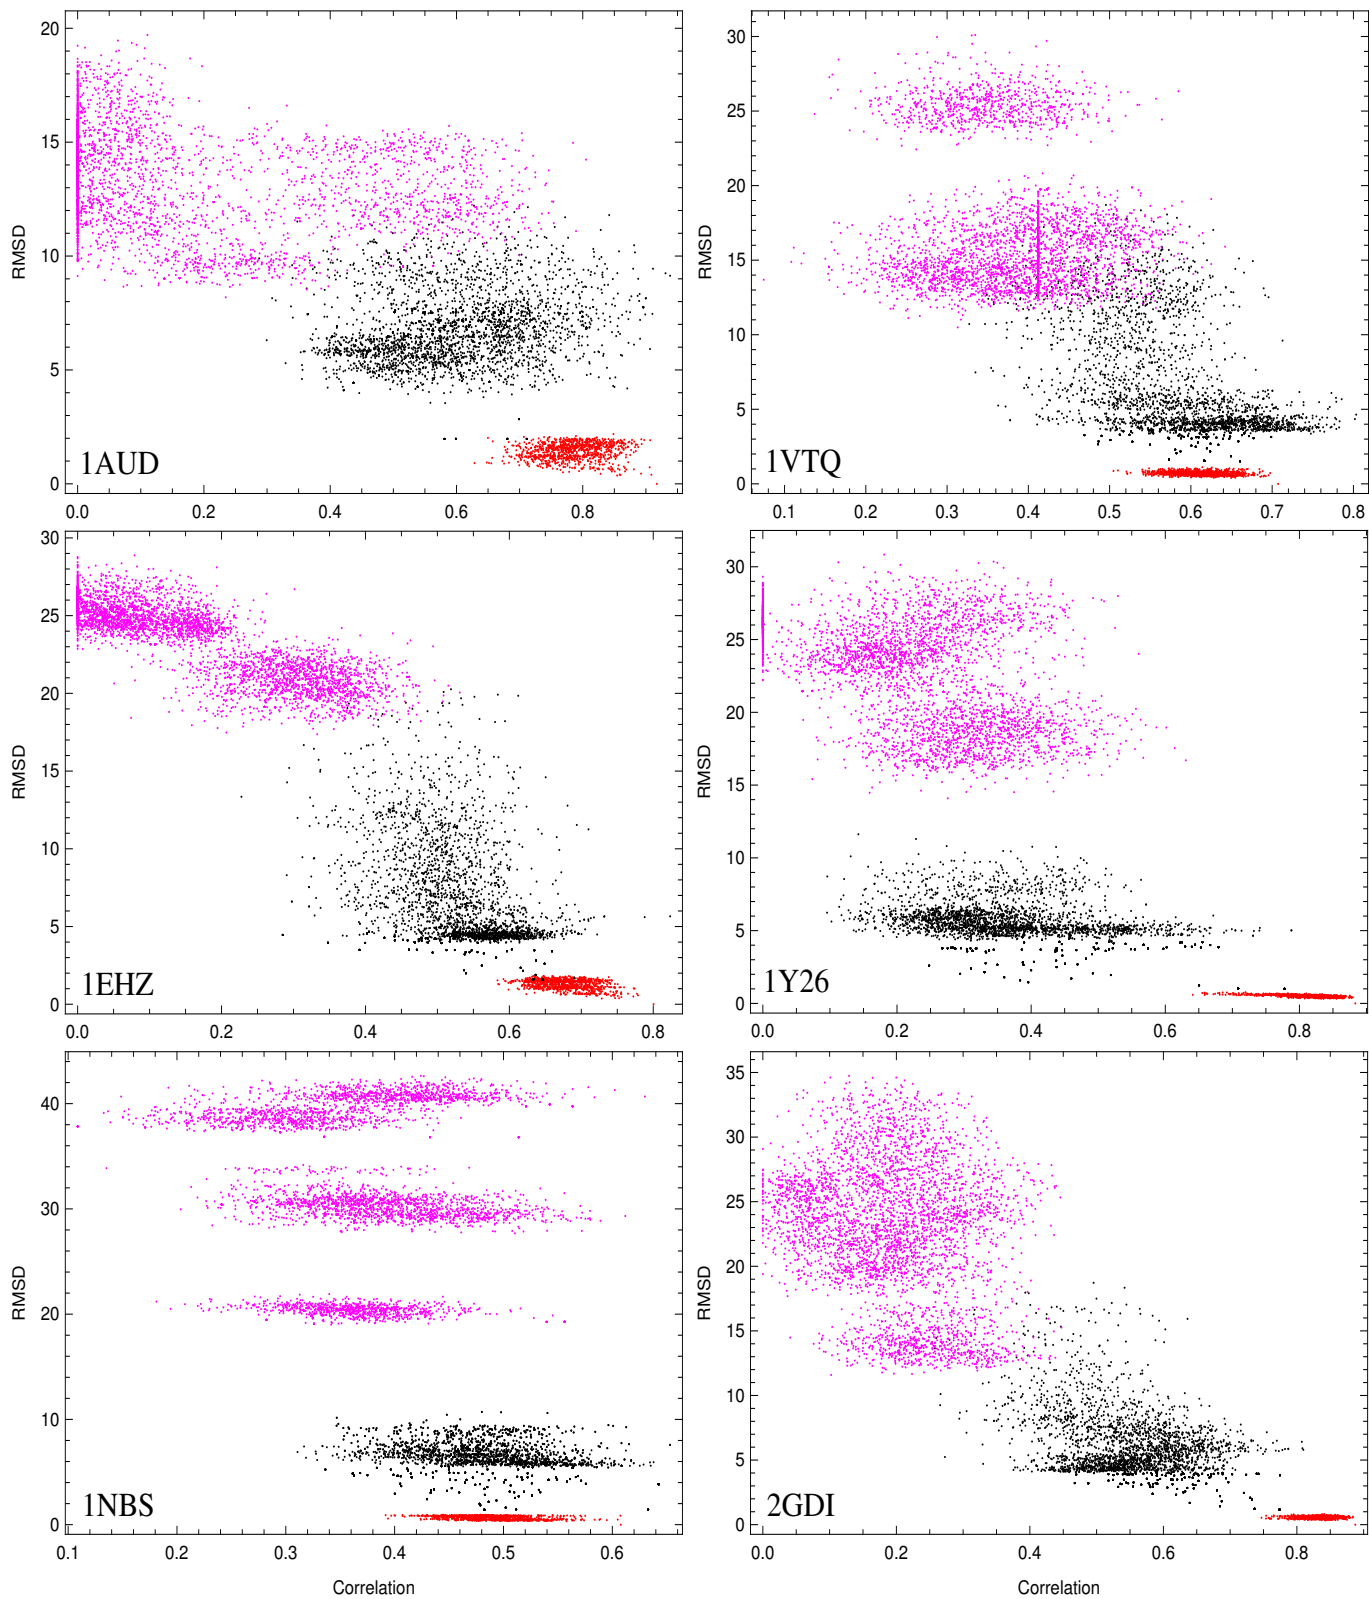

Figure S6: Comparison of RMSD and correlation for the first six cases. Near-native structures from all-atom MD sampling are red; native 2D, non-native 3D structures from CG sampling are black; non-native 2D, non-native 3D structures from CG sampling are magenta.

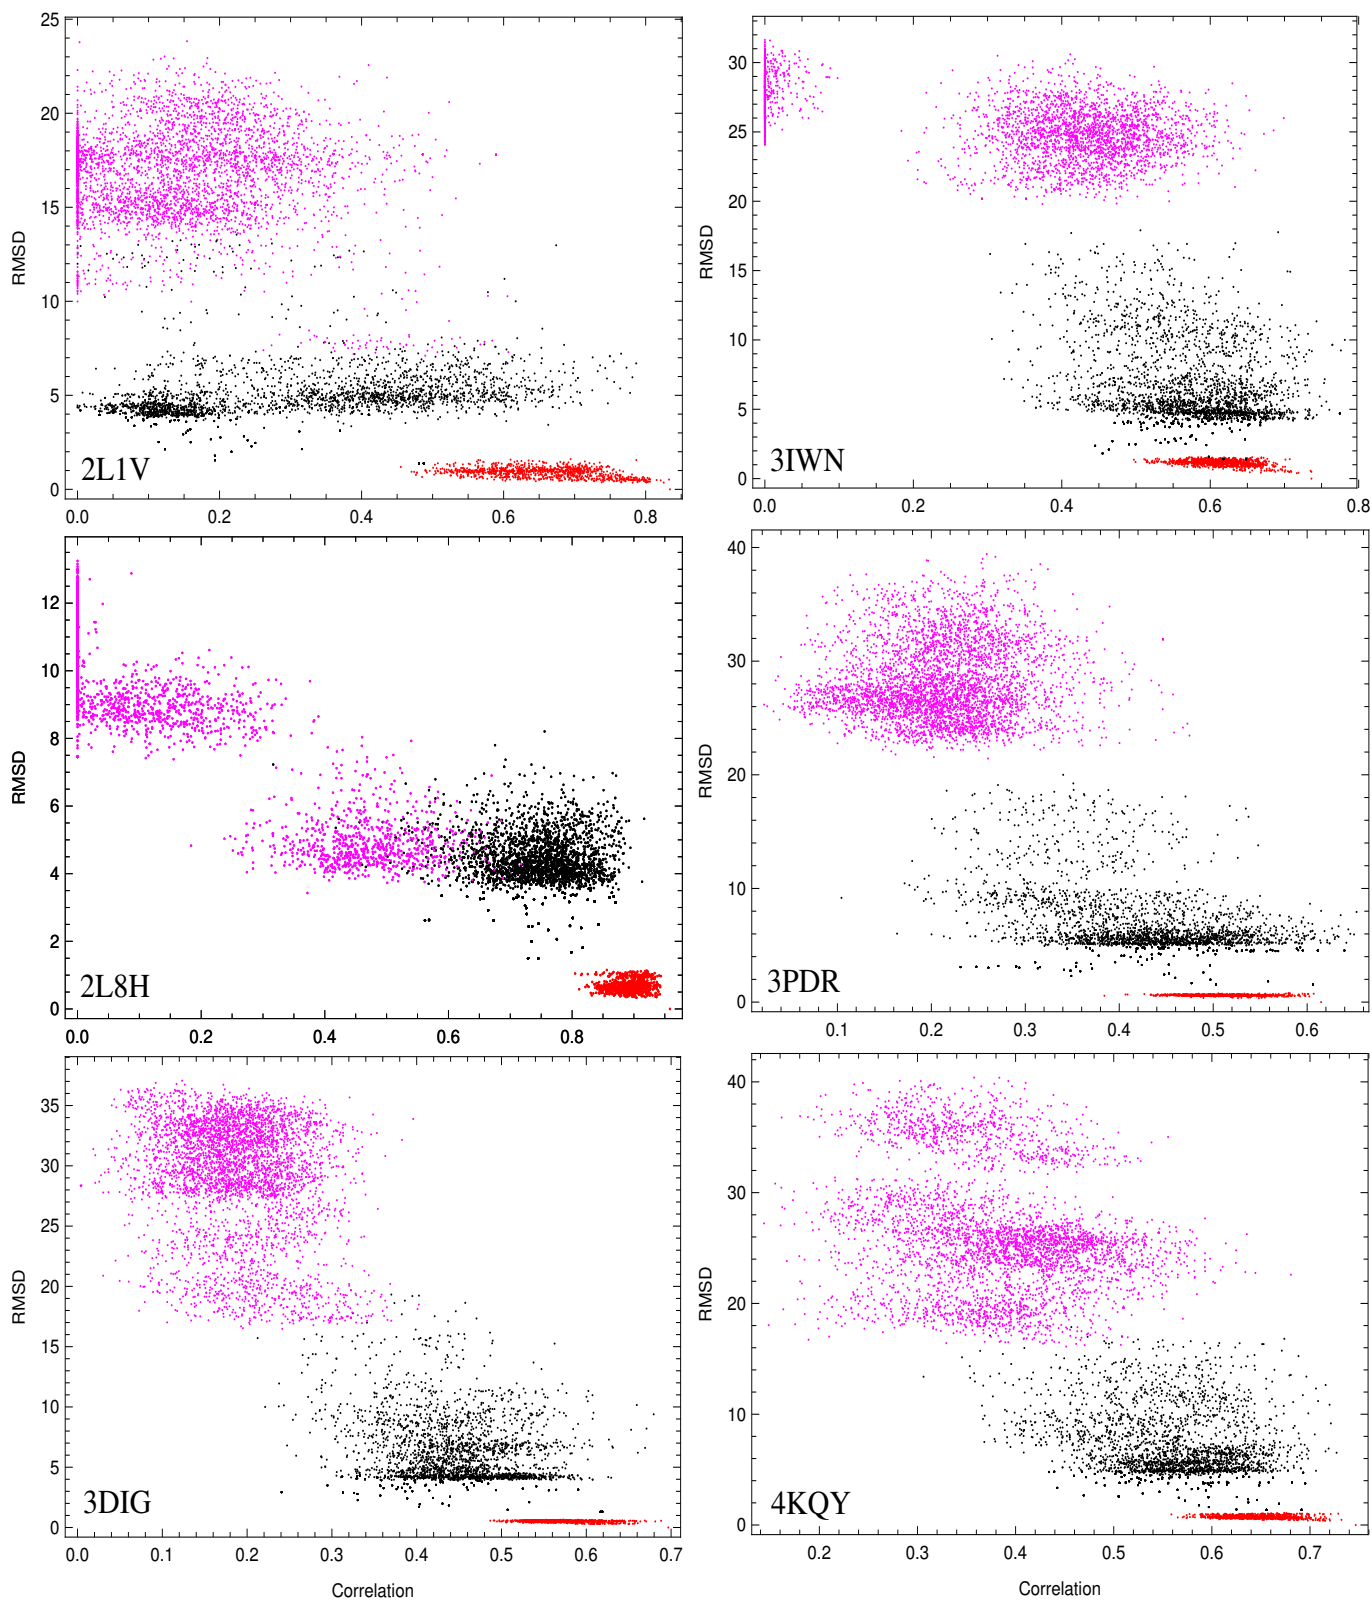

Figure S7: Comparison of RMSD and correlation for the last six cases. Near-native structures from all-atom MD sampling are red; native 2D, non-native 3D structures from CG sampling are black; non-native 2D, non-native 3D structures from CG sampling are magenta.

## References

- [1] Leonard, C. W.; Hajdin, C. E.; Karabiber, F.; Mathews, D. H.; Favorov, O. V.; Dokholyan, N. V.; Weeks, K. M. Principles for understanding the accuracy of SHAPE-directed RNA structure modeling. *Biochemistry*, **2013**, *52*, 588-595.
- [2] Hajdin, C. E.; Bellaousov, S.; Huggins, W.; Leonard, C. W.; Mathews, D. H.; Weeks, K. M. Accurate SHAPE-directed RNA secondary structure modeling, including pseudoknots. *Proc. Natl. Acad. Sci. U. S. A.*, **2013**, *110*, 5498-5503.
- [3] Gherghe, C. M.; Shajani, Z.; Wilkinson, K. A.; Varani, G.; Weeks, K. M. Strong correlation between SHAPE chemistry and the generalized NMR order parameter ( $S^2$ ) in RNA. *J. Am. Chem. Soc.*, **2008**, *130*, 12244-12245.
- [4] Rice, G. M.; Leonard, C. W.; Weeks, K. M. RNA secondary structure modeling at consistent high accuracy using differential SHAPE. *RNA*, **2014**, *20*, 846-854.
